# Supplementary material
Source: Royal Society of Chemistry journal article supplement (doi:10.1039/d5gc06247k)
Supplement: d5gc06247k1.pdf [file d5gc06247k1.pdf]

## Supporting Information

### Hydrogen bonds regulation to enhance catalytic C-C bonds cleavage of polylactic acid wastes in H<sub>2</sub>O to produce H<sub>2</sub>

#### This file includes:

Supplementary Methods

Supplementary Figure 1 to 10

Supplementary Table 1 to 10

References

## Supplementary Methods

### Chemicals and materials

Poly(lactic acid) (PLA) plastic particles, lactic acid, 3-hydroxypropanoic acid, glyceric acid and propanoic acid were purchased from Aladdin Chemistry CO., Ltd. PLA powder, fork, spoon, straw and cup were obtained from Liaoning Jinliang Biotechnology Co., Ltd. NaOH was acquired from Tianjin Kemiou Chemical Reagent Co., Ltd. DMSO- $d_6$  was purchased from Sigma-Aldrich. The different nickel-based catalyst precursors powders were obtained from Dalian Tongyong Chemical Co., Ltd. Carbon dioxide (>99%), methane (>99%), ethane (>99%), propane (>99%), butane (>99%), hydrogen (>99%) and the mixed standard gas were obtained from Zhengzhou Gas Products Co., Ltd. Milli-Q water was used in all experiments.

### Characterization

**Scanning electron microscopy (SEM) characterization:** SEM was conducted on a JEM-7800F (JEOL) microscope, and it was operated at 1.0 kV.

**Transmission electron microscopy (TEM) characterization:** TEM and EDS elemental maps were performed with JEM-2100 (JEOL) microscope, the operated voltage was 200 kV.

**Inductively coupled plasma-optical emission spectrometry (ICP-OES) analysis:** ICP-OES was conducted by ICPS-8100 (Shimadzu), which was operated with the radio-frequency power of 1.0 kW. The catalyst was dissolved in aqua regia and then diluted to a certain volume in the volumetric flask.

**X-ray diffraction (XRD) analysis:** XRD was carried out with the Rigaku D/Max 2500/PC

diffractometer, Cu K $\alpha$  radiation ( $\lambda = 0.15418$  nm) was operated at 40 kV/200 mA. And the wide-angle patterns were scanned from 10° to 90° ( $2\theta$ ) at a scan rate of 2.5° min<sup>-1</sup>.

**<sup>1</sup>H nuclear magnetic resonance (NMR) spectra:** NMR analysis was conducted on a Bruker ADVANCE III 400 MHz spectrometer. Lactic acid, lactic acid and H<sub>2</sub>O mixture were operated from 25 to 50 °C in DMSO-*d*<sub>6</sub>.

**Density functional theory (DFT) calculations:** The first-principles<sup>1,2</sup> was employed to perform DFT calculations within the generalized gradient approximation (GGA) using the Perdew-Burke-Ernzerhof (PBE) formulation.<sup>3</sup> We have chosen the projected augmented wave (PAW) potentials<sup>4,5</sup> to describe the ionic cores and take valence electrons into account using a plane wave basis set with a kinetic energy cutoff of 520 eV. Partial occupancies of the Kohn-Sham orbitals were allowed using the Gaussian smearing method with a width of 0.05 eV. The electronic energy was considered self-consistent when the energy change was smaller than 10<sup>-6</sup> eV. A geometry optimization was considered convergent when the energy change was smaller than 0.03 eV Å<sup>-1</sup>. In this structure, the U correction was used for Ni (4.96 eV) and Fe (4.66 eV) atoms. The vacuum spacing in a direction perpendicular to the plane of the structure is 20 Å for the surfaces. The Brillouin zone integration is performed using 2×2×1 Monkhorst-Pack k-point sampling for a structure. The free energy was calculated using the equation:

$$G = E_{\text{ads}} + \text{ZPE} - \text{TS} \quad (1)$$

where  $G$ ,  $E_{\text{ads}}$ , ZPE and TS were the free energy, total energy from DFT calculations, zero-point energy and entropic contributions, respectively. Finally, transition states for elementary reaction steps were determined by a combination of the nudged elastic band (NEB) method<sup>6</sup>

and the dimer method.<sup>7-9</sup> In the NEB method, the path between the reactant and product was discretized into a series of structural images. The image that was closest to a likely transition state structure, which was then employed as an initial guess structure for the dimer method.

## Supplementary Figure

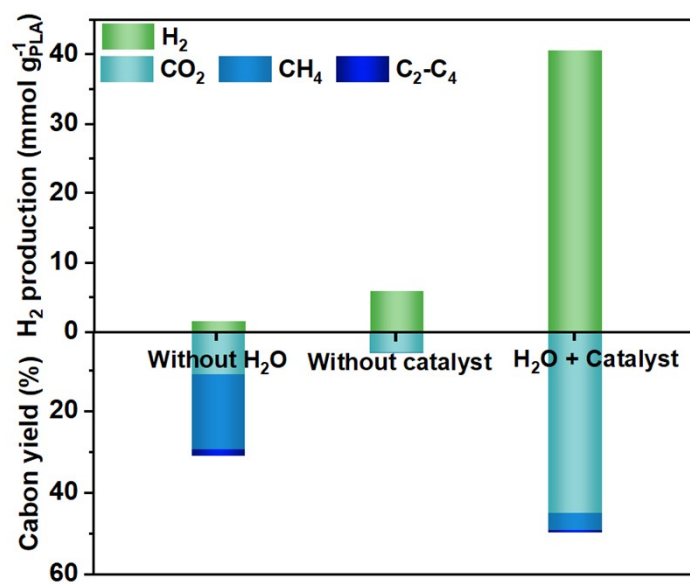

**Fig. S1** Influence of catalyst and H<sub>2</sub>O on the conversion of PLA to H<sub>2</sub>. Reaction condition:

0.2 g PLA, 1.5 mmol Ni-Fe catalyst, 15 mL H<sub>2</sub>O, 10 bar N<sub>2</sub>, 300 °C, 5 h.

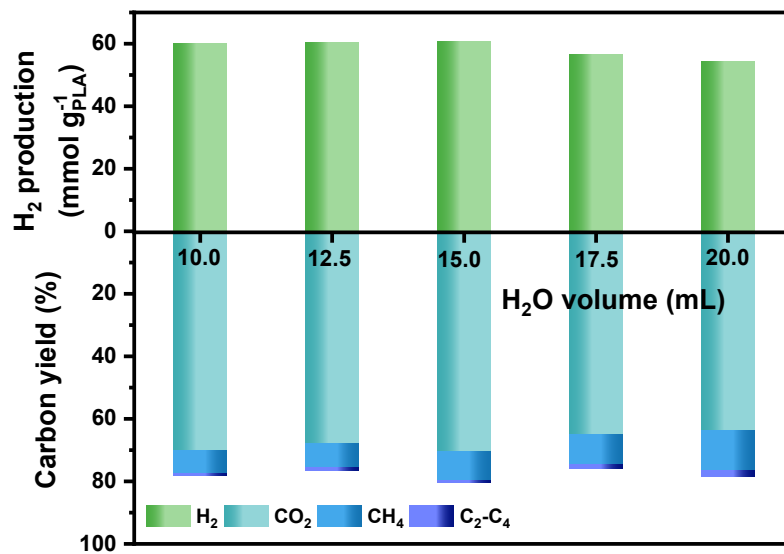

**Fig. S2** Effect of H<sub>2</sub>O volume on the catalytic conversion of PLA to H<sub>2</sub>. Reaction condition:

0.2 g PLA, 1.5 mmol Ni-Fe catalyst, H<sub>2</sub>O, 10 bar N<sub>2</sub>, 310 °C, 5 h.

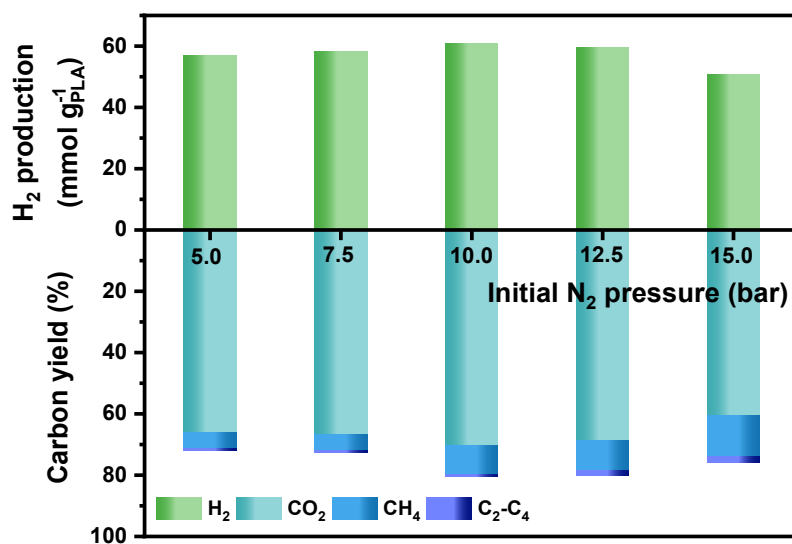

**Fig. S3** Effect of initial N<sub>2</sub> pressure on the catalytic conversion of PLA to H<sub>2</sub>. Reaction condition: 0.2 g PLA, 1.5 mmol Ni-Fe catalyst, 15 mL H<sub>2</sub>O, 310 °C, 5 h.

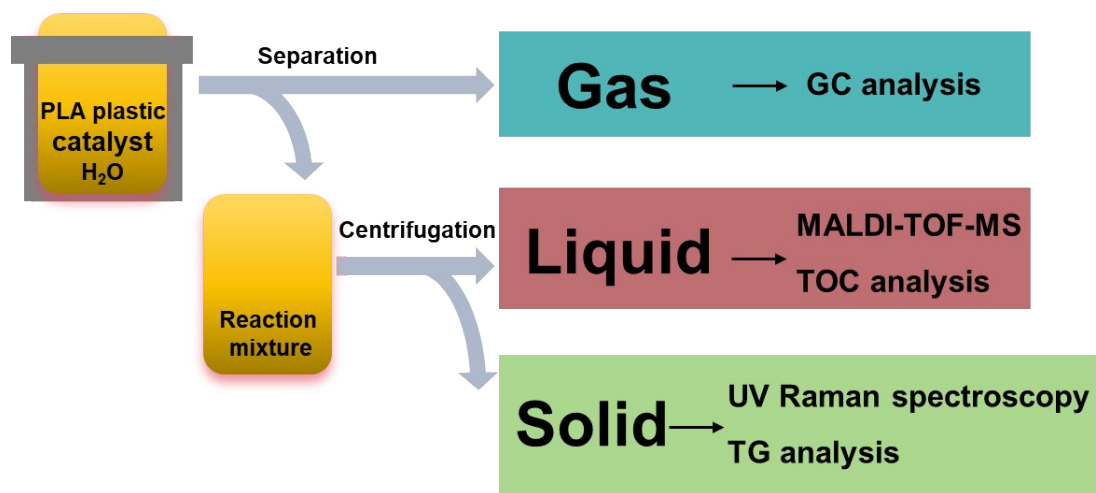

**Fig. S4** The products analysis for the catalytic transformation of PLA. The gas, liquid and solid products were collected and analyzed after reaction.

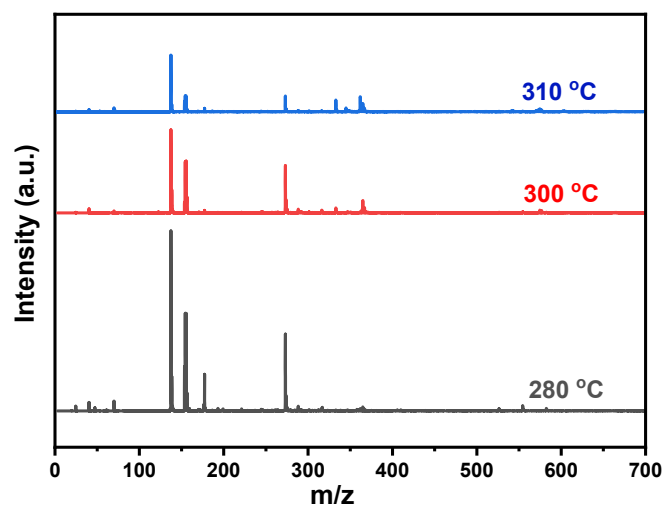

**Fig. S5** MALDI-TOF-MS spectra of liquid products with different reaction temperatures.

Reaction condition: 0.2 g PLA, 1.5 mmol Ni-Fe catalyst, 15 mL H<sub>2</sub>O, 10 bar N<sub>2</sub>, 5 h.

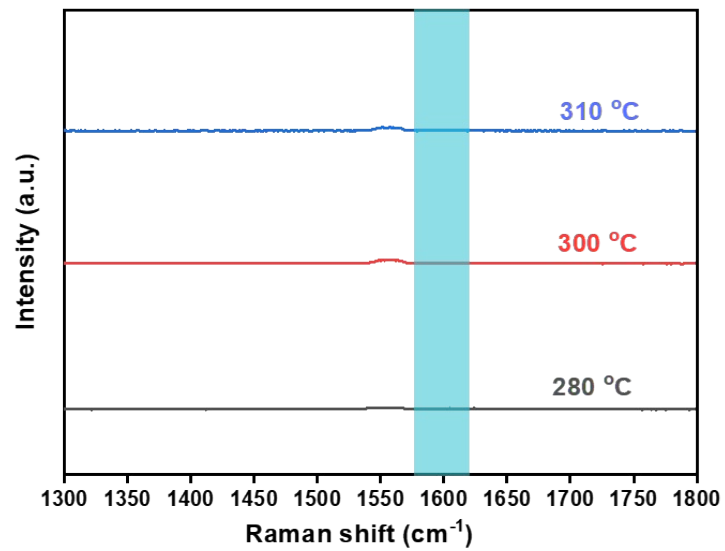

**Fig. S6** UV Raman spectra of solid residue with different reaction temperatures. Reaction condition: 0.2 g PLA, 1.5 mmol Ni-Fe catalyst, 15 mL H<sub>2</sub>O, 10 bar N<sub>2</sub>, 5 h.

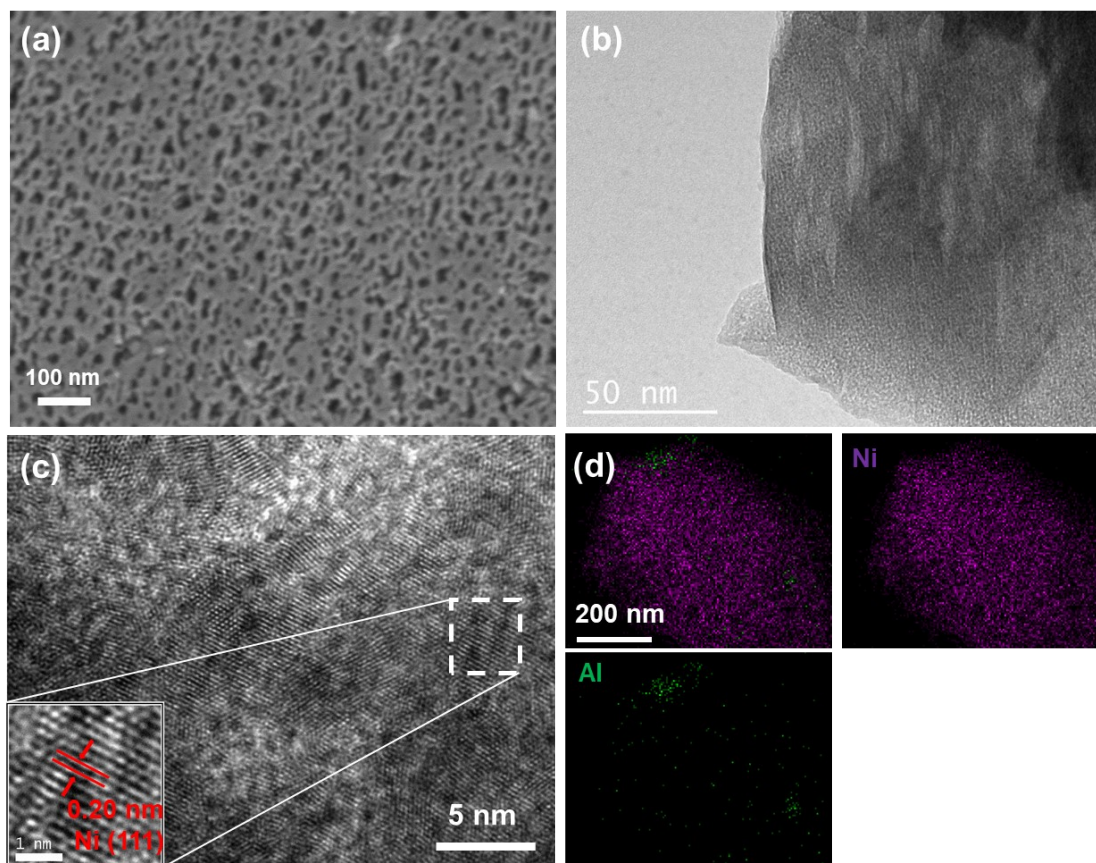

**Fig. S7** SEM and TEM images of Ni catalyst. (a) SEM image of Ni catalyst. (b-d) TEM images with EDS elemental mapping of Ni catalyst.

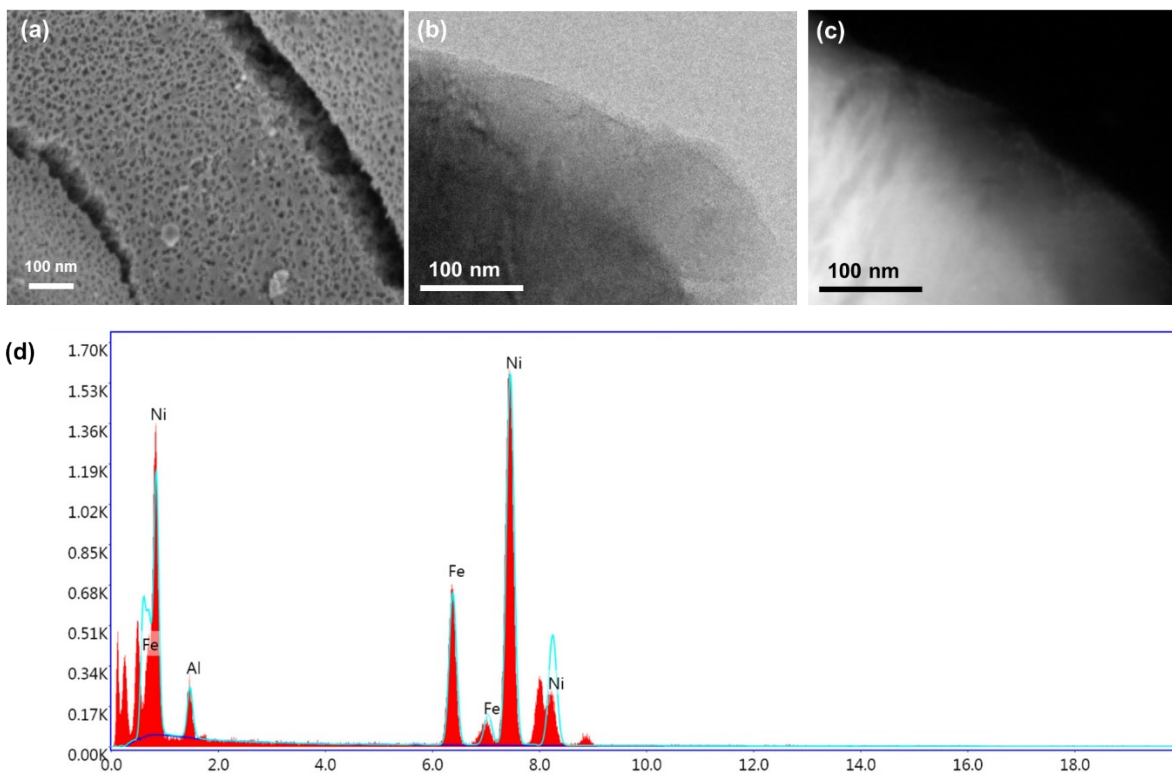

**Fig. S8** SEM and TEM images of Ni-Fe catalyst. (a) SEM image of Ni-Fe catalyst. (b-d) STEM images with elemental analysis of Ni-Fe catalyst.

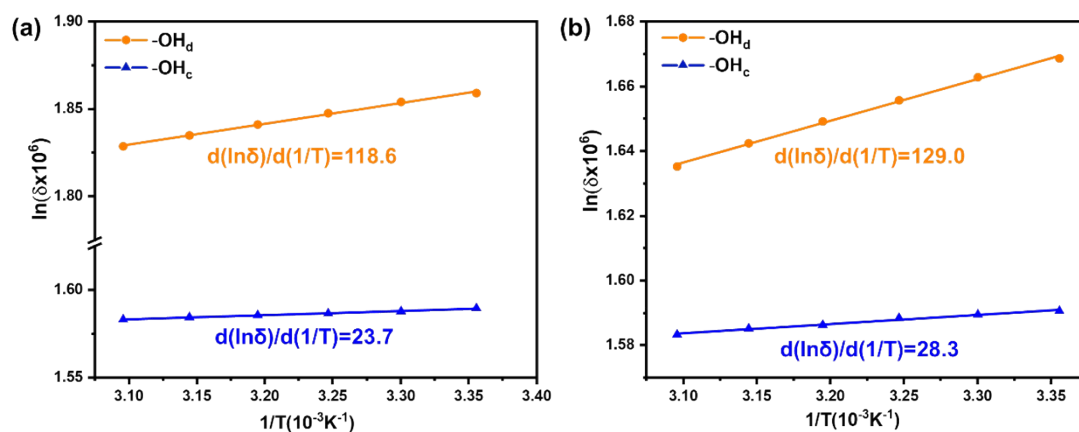

**Fig. S9** Linear fits of  $\ln\delta$  versus  $1/T$ . (a) Linear fits of  $\ln\delta$  versus  $1/T$  for  $-\text{OH}_d$  and  $-\text{OH}_c$  in lactic acid. (b) Linear fits of  $\ln\delta$  versus  $1/T$  for  $-\text{OH}_d$  and  $-\text{OH}_c$  in lactic acid and  $\text{H}_2\text{O}$  with the mole ratio of 1:1.

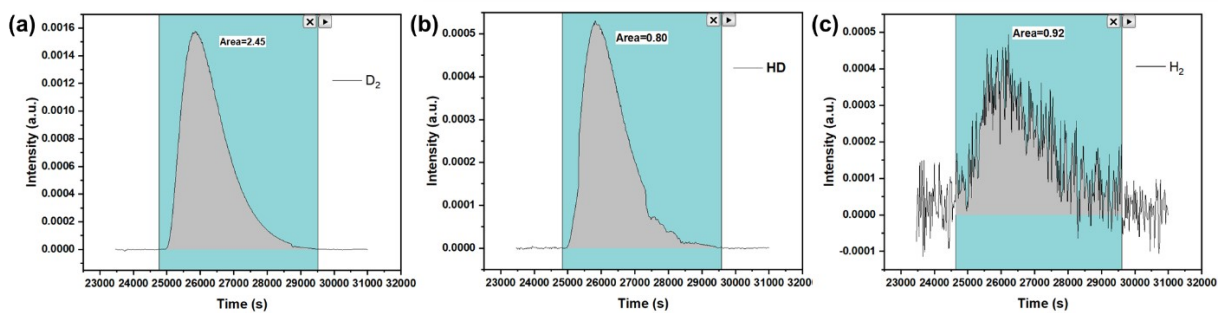

**Fig. S10** Mass spectrometry analysis of hydrogen production from the catalytic conversion of PLA in qualitative and semi-quantitative. Reaction condition: 0.2 g PLA-based cup, 1.5 mmol Ni-Fe catalyst, 15 mL  $D_2O$ , 10 bar  $N_2$ , 310 °C, 5 h.

## Supplementary Table

**Table S1** H<sub>2</sub> production, H<sub>2</sub> selectivity, carbon yield of gas products and the detailed distribution of CO<sub>2</sub>, CH<sub>4</sub> and C<sub>2</sub>-C<sub>4</sub> hydrocarbons over the different catalysts.

| Entry <sup>a</sup> | Catalyst | H <sub>2</sub> production<br>(mmol g <sup>-1</sup> PLA) | H <sub>2</sub><br>selectivity<br>(%) | Gas carbon<br>yield (%) | Gas carbon products<br>distribution (mol%) |                      |                                |
|--------------------|----------|---------------------------------------------------------|--------------------------------------|-------------------------|--------------------------------------------|----------------------|--------------------------------|
|                    |          |                                                         |                                      |                         | CO <sub>2</sub>                            | CH <sub>4</sub>      | C <sub>2</sub> -C <sub>4</sub> |
| 1 <sup>b</sup>     | Fe       | 10.3 <sub>±0</sub>                                      | 63.0 <sub>±2.3</sub>                 | 19.8 <sub>±0.8</sub>    | 77.0 <sub>±0.8</sub>                       | 20.2 <sub>±0.7</sub> | 2.8 <sub>±0</sub>              |
| 2 <sup>c</sup>     | Ni       | 22.4 <sub>±0.4</sub>                                    | 79.2 <sub>±2.0</sub>                 | 34.0 <sub>±0.2</sub>    | 85.8 <sub>±0.8</sub>                       | 13.0 <sub>±0.8</sub> | 1.2 <sub>±0</sub>              |
| 3                  | Ni-Fe    | 40.6 <sub>±0.4</sub>                                    | 98.4 <sub>±0.4</sub>                 | 49.7 <sub>±0.2</sub>    | 90.5 <sub>±2.3</sub>                       | 8.4 <sub>±2.2</sub>  | 1.1 <sub>±0.1</sub>            |
| 4 <sup>d</sup>     | Ni-Sn    | 20.9 <sub>±0.3</sub>                                    | 57.7 <sub>±0.8</sub>                 | 43.0 <sub>±0.2</sub>    | 74.1 <sub>±0.5</sub>                       | 21.8 <sub>±0.4</sub> | 4.2 <sub>±0.1</sub>            |
| 5 <sup>e</sup>     | Ni-Mo    | 19.0 <sub>±0.3</sub>                                    | 89.2 <sub>±0</sub>                   | 25.5 <sub>±0.5</sub>    | 91.6 <sub>±1.2</sub>                       | 7.5 <sub>±1.0</sub>  | 0.9 <sub>±0</sub>              |

<sup>a</sup>The hydrogen and carbon yield of gas products were quantified by GC analysis, reaction condition: 0.2 g PLA, 1.5 mmol Ni-Fe catalyst, 15 mL H<sub>2</sub>O, 10 bar N<sub>2</sub>, 300 °C, 5 h.

<sup>b</sup>2.0 mmol Fe catalyst.

<sup>c</sup>2.0 mmol Ni catalyst.

<sup>d</sup>1.6 mmol Ni-Sn catalyst.

<sup>e</sup>1.9 mmol Ni-Mo catalyst.

**Table S2** H<sub>2</sub> production, H<sub>2</sub> selectivity, carbon yield of gas products and the detailed distribution of CO<sub>2</sub>, CH<sub>4</sub> and C<sub>2</sub>-C<sub>4</sub> hydrocarbons without H<sub>2</sub>O or catalyst.

| Entry <sup>a</sup> | Reaction condition          | H <sub>2</sub> production<br>(mmol g <sub>PLA</sub> <sup>-1</sup> ) | Gas carbon<br>yield (%) | Gas carbon products distribution<br>(mol%) |                 |                                |
|--------------------|-----------------------------|---------------------------------------------------------------------|-------------------------|--------------------------------------------|-----------------|--------------------------------|
|                    |                             |                                                                     |                         | CO <sub>2</sub>                            | CH <sub>4</sub> | C <sub>2</sub> -C <sub>4</sub> |
| 1                  | Without H <sub>2</sub> O    | 1.5                                                                 | 30.9                    | 35.7                                       | 59.3            | 5.0                            |
| 2                  | Without catalyst            | 5.9                                                                 | 5.8                     | 95.3                                       | 3.2             | 1.5                            |
| 3                  | H <sub>2</sub> O + Catalyst | 40.6                                                                | 49.7                    | 90.5                                       | 8.4             | 1.1                            |

<sup>a</sup>Reaction condition: 0.2 g PLA, 1.5 mmol Ni-Fe catalyst, 15 mL H<sub>2</sub>O, 10 bar N<sub>2</sub>, 300 °C, 5 h.

**Table S3** H<sub>2</sub> production, H<sub>2</sub> selectivity, carbon yield of gas products and the detailed distribution of CO<sub>2</sub>, CH<sub>4</sub> and C<sub>2</sub>-C<sub>4</sub> hydrocarbons with the different reaction temperature.

| Entry <sup>a</sup> | Reaction temperature (°C) | H <sub>2</sub> production (mmol g <sub>PLA</sub> <sup>-1</sup> ) | Gas carbon yield (%) | Gas carbon products distribution (mol%) |                      |                                |
|--------------------|---------------------------|------------------------------------------------------------------|----------------------|-----------------------------------------|----------------------|--------------------------------|
|                    |                           |                                                                  |                      | CO <sub>2</sub>                         | CH <sub>4</sub>      | C <sub>2</sub> -C <sub>4</sub> |
| 1                  | 280                       | 16.3 <sub>±0.4</sub>                                             | 21.2 <sub>±0.1</sub> | 80.7 <sub>±1.3</sub>                    | 17.1 <sub>±1.4</sub> | 2.2 <sub>±0</sub>              |
| 2                  | 290                       | 26.0 <sub>±0.3</sub>                                             | 31.2 <sub>±0.3</sub> | 87.9 <sub>±0.2</sub>                    | 10.2 <sub>±0.1</sub> | 1.9 <sub>±0.1</sub>            |
| 3                  | 300                       | 40.6 <sub>±0.4</sub>                                             | 49.7 <sub>±0.2</sub> | 90.5 <sub>±2.3</sub>                    | 8.4 <sub>±2.2</sub>  | 1.1 <sub>±0.1</sub>            |
| 4                  | 310                       | 60.8 <sub>±0.2</sub>                                             | 80.4 <sub>±0.5</sub> | 87.0 <sub>±0.1</sub>                    | 11.8 <sub>±0.2</sub> | 1.2 <sub>±0</sub>              |
| 5                  | 320                       | 62.0 <sub>±0.3</sub>                                             | 82.1 <sub>±0.2</sub> | 87.1 <sub>±0.5</sub>                    | 11.4 <sub>±0.4</sub> | 1.5 <sub>±0.1</sub>            |

<sup>a</sup>Reaction condition: 0.2 g PLA, 1.5 mmol Ni-Fe catalyst, 15 mL H<sub>2</sub>O, 10 bar N<sub>2</sub>, 5 h.

**Table S4** H<sub>2</sub> production, H<sub>2</sub> selectivity, carbon yield of gas products and the detailed distribution of CO<sub>2</sub>, CH<sub>4</sub> and C<sub>2</sub>-C<sub>4</sub> hydrocarbons with the different H<sub>2</sub>O volume.

| Entry <sup>a</sup> | H <sub>2</sub> O volume (mL) | H <sub>2</sub> production (mmol g <sub>PLA</sub> <sup>-1</sup> ) | H <sub>2</sub> selectivity (%) | Gas carbon yield (%) | Gas carbon products distribution (mol%) |                 |                                |
|--------------------|------------------------------|------------------------------------------------------------------|--------------------------------|----------------------|-----------------------------------------|-----------------|--------------------------------|
|                    |                              |                                                                  |                                |                      | CO <sub>2</sub>                         | CH <sub>4</sub> | C <sub>2</sub> -C <sub>4</sub> |
| 1                  | 10.0                         | 60.2                                                             | 92.4                           | 78.2                 | 89.6                                    | 9.3             | 1.1                            |
| 2                  | 12.5                         | 60.3                                                             | 94.7                           | 76.4                 | 89.0                                    | 9.8             | 1.2                            |
| 3                  | 15.0                         | 60.8                                                             | 90.7                           | 80.4                 | 87.0                                    | 11.8            | 1.2                            |
| 4                  | 17.5                         | 56.6                                                             | 89.3                           | 76.0                 | 85.7                                    | 12.6            | 1.7                            |
| 5                  | 20.0                         | 54.2                                                             | 83.1                           | 78.4                 | 81.2                                    | 16.4            | 2.4                            |

<sup>a</sup>Reaction condition: 0.2 g PLA, 1.5 mmol Ni-Fe catalyst, H<sub>2</sub>O, 10 bar N<sub>2</sub>, 310 °C, 5 h.

**Table S5** H<sub>2</sub> production, H<sub>2</sub> selectivity, carbon yield of gas products and the detailed distribution of CO<sub>2</sub>, CH<sub>4</sub> and C<sub>2</sub>-C<sub>4</sub> hydrocarbons with the different initial N<sub>2</sub> pressure.

| Entry <sup>a</sup> | Initial N <sub>2</sub> pressure (bar) | H <sub>2</sub> production (mmol g <sub>PLA</sub> <sup>-1</sup> ) | H <sub>2</sub> selectivity (%) | Gas carbon yield (%) | Gas carbon products distribution (mol%) |                 |                                |
|--------------------|---------------------------------------|------------------------------------------------------------------|--------------------------------|----------------------|-----------------------------------------|-----------------|--------------------------------|
|                    |                                       |                                                                  |                                |                      | CO <sub>2</sub>                         | CH <sub>4</sub> | C <sub>2</sub> -C <sub>4</sub> |
| 1                  | 5.0                                   | 57.0                                                             | 95.1                           | 72.0                 | 91.6                                    | 7.3             | 1.1                            |
| 2                  | 7.5                                   | 58.3                                                             | 96.4                           | 72.6                 | 91.7                                    | 7.2             | 1.1                            |
| 3                  | 10.0                                  | 60.8                                                             | 90.7                           | 80.4                 | 87.0                                    | 11.8            | 1.2                            |
| 4                  | 12.5                                  | 59.6                                                             | 89.2                           | 80.1                 | 85.7                                    | 12.3            | 2.0                            |
| 5                  | 15.0                                  | 50.7                                                             | 80.2                           | 76.0                 | 79.8                                    | 17.5            | 2.7                            |

<sup>a</sup>Reaction condition: 0.2 g PLA, 1.5 mmol Ni-Fe catalyst, 15 mL H<sub>2</sub>O, N<sub>2</sub>, 310 °C, 5 h.

**Table S6** H<sub>2</sub> production, carbon yield of gas products and the detailed distribution of CO<sub>2</sub>, CH<sub>4</sub> and C<sub>2</sub>-C<sub>4</sub> hydrocarbons with the different reaction time.

| Entry <sup>a</sup> | Reaction time<br>(min) | H <sub>2</sub> production<br>(mmol g <sup>-1</sup> PLA) | Gas carbon<br>yield (%) | Gas carbon products distribution<br>(mol%) |                 |                                |
|--------------------|------------------------|---------------------------------------------------------|-------------------------|--------------------------------------------|-----------------|--------------------------------|
|                    |                        |                                                         |                         | CO <sub>2</sub>                            | CH <sub>4</sub> | C <sub>2</sub> -C <sub>4</sub> |
| 1                  | 10                     | 16.7                                                    | 21.5                    | 91.3                                       | 8.0             | 0.7                            |
| 2                  | 30                     | 23.6                                                    | 29.5                    | 86.5                                       | 12.6            | 0.9                            |
| 3                  | 60                     | 32.4                                                    | 37.8                    | 90.0                                       | 9.3             | 0.7                            |
| 4                  | 120                    | 54.5                                                    | 70.9                    | 87.3                                       | 11.3            | 1.4                            |
| 5                  | 180                    | 56.9                                                    | 72.2                    | 87.7                                       | 10.9            | 1.4                            |
| 6                  | 300                    | 60.8                                                    | 80.4                    | 87.0                                       | 11.8            | 1.2                            |
| 7                  | 420                    | 60.8                                                    | 78.7                    | 86.6                                       | 11.8            | 1.6                            |

<sup>a</sup>Reaction condition: 0.2 g PLA, 1.5 mmol Ni-Fe catalyst, 15 mL H<sub>2</sub>O, 10 bar N<sub>2</sub>, 310 °C.

**Table S7** H<sub>2</sub> yield, carbon yield of gas products and the detailed distribution of CO<sub>2</sub>, CH<sub>4</sub> and C<sub>2</sub>-C<sub>4</sub> hydrocarbons from the model compounds conversion over Ni catalyst.

| Entry <sup>a</sup> | Substrate               | H <sub>2</sub> yield (%) | Gas carbon yield (%) | Gas carbon products distribution (mol%) |                 |                                |
|--------------------|-------------------------|--------------------------|----------------------|-----------------------------------------|-----------------|--------------------------------|
|                    |                         |                          |                      | CO <sub>2</sub>                         | CH <sub>4</sub> | C <sub>2</sub> -C <sub>4</sub> |
| 1                  | PLA                     | 18.7                     | 24.9                 | 88.0                                    | 10.4            | 1.6                            |
| 2                  | Lactic acid             | 20.8                     | 21.6                 | 87.6                                    | 10.6            | 1.8                            |
| 3                  | Glyceric acid           | 47.5                     | 62.1                 | 86.4                                    | 13.1            | 0.5                            |
| 4                  | Propionic acid          | 9.1                      | 4.5                  | 86.7                                    | 6.7             | 6.6                            |
| 5                  | 3-Hydroxypropionic acid | 32.1                     | 50.9                 | 67.2                                    | 27.5            | 5.3                            |

<sup>a</sup>Reaction condition: 0.2 g substrate, 2.0 mmol Ni catalyst, 15 mL H<sub>2</sub>O, 10 bar N<sub>2</sub>, 290 °C, 5 h.

**Table S8** H<sub>2</sub> yield, carbon yield of gas products and the detailed distribution of CO<sub>2</sub>, CH<sub>4</sub> and C<sub>2</sub>-C<sub>4</sub> hydrocarbons from the model compounds conversion over Ni-Fe catalyst.

| Entry <sup>a</sup> | Substrate               | H <sub>2</sub> yield (%) | Gas carbon yield (%) | Gas carbon products distribution (mol%) |                 |                                |
|--------------------|-------------------------|--------------------------|----------------------|-----------------------------------------|-----------------|--------------------------------|
|                    |                         |                          |                      | CO <sub>2</sub>                         | CH <sub>4</sub> | C <sub>2</sub> -C <sub>4</sub> |
| 1                  | PLA                     | 31.2                     | 31.2                 | 87.9                                    | 10.2            | 1.9                            |
| 2                  | Lactic acid             | 39.7                     | 41.6                 | 92.7                                    | 6.1             | 1.2                            |
| 3                  | Glyceric acid           | 70.8                     | 82.0                 | 82.5                                    | 16.2            | 1.3                            |
| 4                  | Propionic acid          | 55.1                     | 59.5                 | 82.7                                    | 11.0            | 6.3                            |
| 5                  | 3-Hydroxypropionic acid | 71.7                     | 81.2                 | 80.9                                    | 14.4            | 4.7                            |

<sup>a</sup>Reaction condition: 0.2 g substrate, 1.5 mmol Ni-Fe catalyst, 15 mL H<sub>2</sub>O, 10 bar N<sub>2</sub>, 290 °C, 5 h.

**Table S9** The content of C, H and O in PLA plastic wastes.

| Entry <sup>a</sup> | Substrate  | C (%) | H (%) | O (%) | Others (%) |
|--------------------|------------|-------|-------|-------|------------|
| 1                  | Powder     | 50.3  | 5.4   | 43.6  | 0.7        |
| 2                  | Fork-spoon | 37.5  | 4.2   | 32.6  | 25.7       |
| 3                  | Straw      | 42.7  | 4.4   | 35.7  | 17.2       |
| 4                  | Cup        | 49.9  | 5.3   | 43.2  | 1.6        |

<sup>a</sup>According to the content of C, H and O in PLA plastic wastes, the mole numbers of C, H and O in a certain amount of PLA plastic wastes could be calculated. Others contained N, S and ash.

In our work, the content of C, H and O in PLA-based cup was measured, which could be denoted as a chemical formula of C<sub>3</sub>H<sub>4</sub>O<sub>2</sub>. For the catalytic conversion of PLA-based cup to CO<sub>2</sub> and H<sub>2</sub>, the theoretical chemical equation was shown as follows:

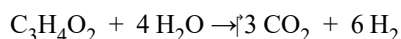

However, in our experiment, some other gas products, such as CH<sub>4</sub> and C<sub>2</sub>-C<sub>4</sub> hydrocarbons, also generated. And the coefficient of gas products was determined on the basis of the mole percentage of gas products after the reaction at 310 °C. Furthermore, the coefficient of C<sub>3</sub>H<sub>4</sub>O<sub>2</sub> and H<sub>2</sub>O was calculated according to the gas carbon yield and hydrogen yield. Ultimately, the chemical equation based on our experiment results was shown below:

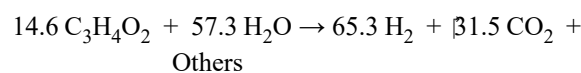

Hereinto, others included the deposited carbon species and small amount of organic molecules, etc.

**Table S10** H<sub>2</sub> production, H<sub>2</sub> selectivity, carbon yield of gas products and the detailed distribution of CO<sub>2</sub>, CH<sub>4</sub> and C<sub>2</sub>-C<sub>4</sub> hydrocarbons with different PC plastic wastes.

| Entry <sup>a</sup> | Substrate  | H <sub>2</sub> production<br>(mmol g <sup>-1</sup> <sub>plastic</sub> ) | H <sub>2</sub><br>selectivity<br>(%) | Gas carbon<br>yield (%) | Gas carbon products<br>distribution (mol%) |                     |                                |
|--------------------|------------|-------------------------------------------------------------------------|--------------------------------------|-------------------------|--------------------------------------------|---------------------|--------------------------------|
|                    |            |                                                                         |                                      |                         | CO <sub>2</sub>                            | CH <sub>4</sub>     | C <sub>2</sub> -C <sub>4</sub> |
| 1                  | Powder     | 53.8 <sub>±0.5</sub>                                                    | 97.4 <sub>±0.2</sub>                 | 66.3 <sub>±0.7</sub>    | 90.1 <sub>±0.3</sub>                       | 8.8 <sub>±0.3</sub> | 1.1 <sub>±0</sub>              |
| 2                  | Fork-spoon | 49.3 <sub>±0.3</sub>                                                    | 98.9 <sub>±0.7</sub>                 | 59.8 <sub>±0.7</sub>    | 91.0 <sub>±0.4</sub>                       | 7.7 <sub>±0.4</sub> | 1.3 <sub>±0</sub>              |
| 3                  | Straw      | 52.0 <sub>±0.1</sub>                                                    | 99.8 <sub>±0</sub>                   | 62.6 <sub>±0.1</sub>    | 90.9 <sub>±0.5</sub>                       | 8.0 <sub>±0.4</sub> | 1.1 <sub>±0</sub>              |
| 4                  | Cup        | 62.6 <sub>±0.2</sub>                                                    | 93.5 <sub>±0.2</sub>                 | 80.5 <sub>±0.1</sub>    | 90.1 <sub>±0.2</sub>                       | 8.6 <sub>±0.2</sub> | 1.3 <sub>±0</sub>              |

<sup>a</sup>Reaction condition: 0.2 g PLA-based substrates, 1.5 mmol Ni-Fe catalyst, 15 mL H<sub>2</sub>O, 10 bar N<sub>2</sub>, 310 °C, 5 h.

## Reference

- [1] G. Kresse and J. Furthmüller, *Comp. Mater. Sci.*, 1996, **6**, 15-50.
- [2] G. Kresse and J. Furthmüller, *Phys. Rev. B*, 1996, **54**, 11169-11186.
- [3] J. P. Perdew, K. Burke and M. Ernzerhof, *Phys. Rev. Lett.*, 1996, **77**, 3865-3868.
- [4] G. Kresse and D. Joubert, *Phys. Rev. B*, 1999, **59**, 1758-1775.
- [5] P. E. Blöchl, *Phys. Rev. B*, 1994, **50**, 17953-17979.
- [6] G. Henkelman, B. P. Uberuaga and H. Jonsson, *J. Chem. Phys.*, 2000, **113**, 9901.
- [7] G. Henkelman and H. Jonsson, *J. Chem. Phys.*, 1999, **111**, 7010-7022.
- [8] R. A. Olsen, G. J. Kroes, G. Henkelman, A. Arnaldsson and H. Jónsson, *J. Chem. Phys.*, 2004, **121**, 9776-9792.
- [9] A. Heyden, A. T. Bell and F. J. Keil, *J. Chem. Phys.*, 2005, **123**, 224101.
